# Supplementary material for: Synthesis and structural characterization of well-defined anionic aluminium alkoxide complexes supported by NON-type diamido ether tridentate ligands and their use for the controlled ROP of lactide
Source: Royal Society of Chemistry journal article supplement (doi:10.1039/b911802k), 2009-09-22
Supplement: b911802k.pdf [file b911802k.pdf]

## Electronic Supporting Information

For

*Synthesis and structural characterization of well-defined lithium aluminium  
alkoxide complexes supported by NON-type diamido ether tridentate ligands  
and their use for the controlled ROP of lactide*

Frédéric Hild,<sup>§</sup> Pierre Haquette<sup>‡</sup> and Samuel Dagorne<sup>§\*</sup>

<sup>§</sup>Laboratoire DECOMET, Institut de Chimie (UMR CNRS 7177), Université de Strasbourg, 4  
rue Blaise Pascal, 67000 Strasbourg, France.

and

<sup>‡</sup>Laboratoire Charles Friedel, UMR CNRS 7223, Ecole Nationale Supérieure de Chimie de  
Paris, 11 rue Pierre et Marie Curie, 75005 Paris, France.

### Table of Contents

- **Figures S1 and S2** : MALDI-TOF spectra of PLA
- **Figure S3** : Molecular structure (ORTEP drawing) of the Al hydrido complex **2b**
- **Table S1**: Summary of crystallographic data for compound **2b**

---

\* E-mail: dagorne@unistra.fr

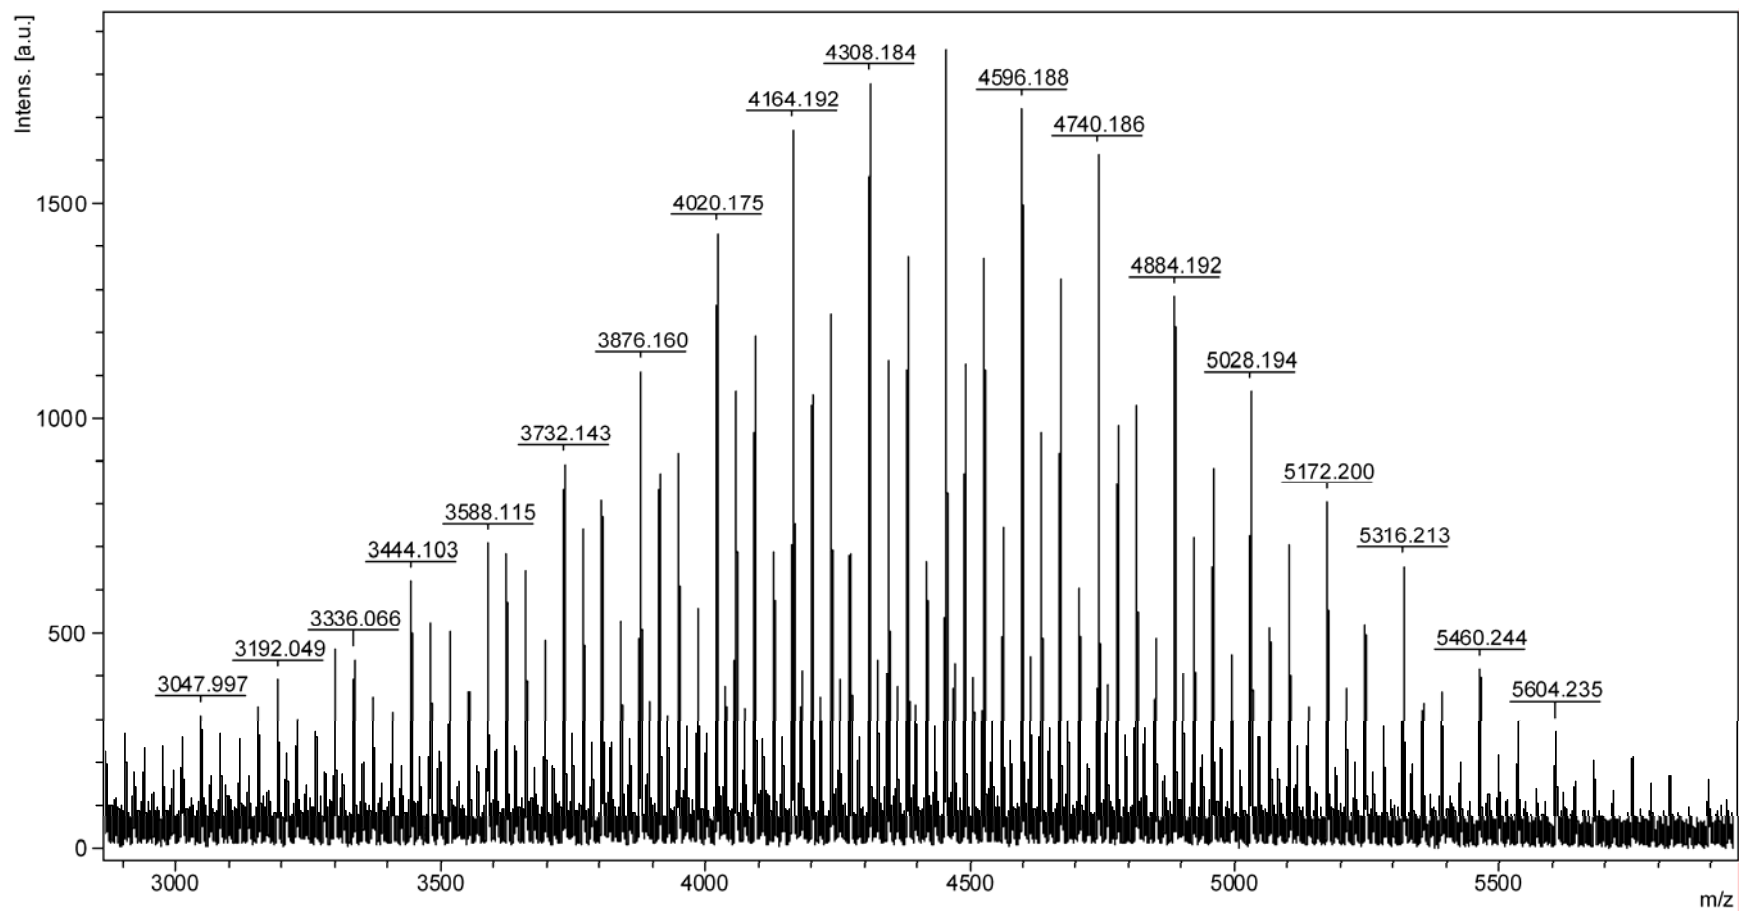

**Figure S1.** MALDI-TOF mass spectrum of the PLA obtained after ROP of *rac*-LA for 8h (CH<sub>2</sub>Cl<sub>2</sub>, RT)

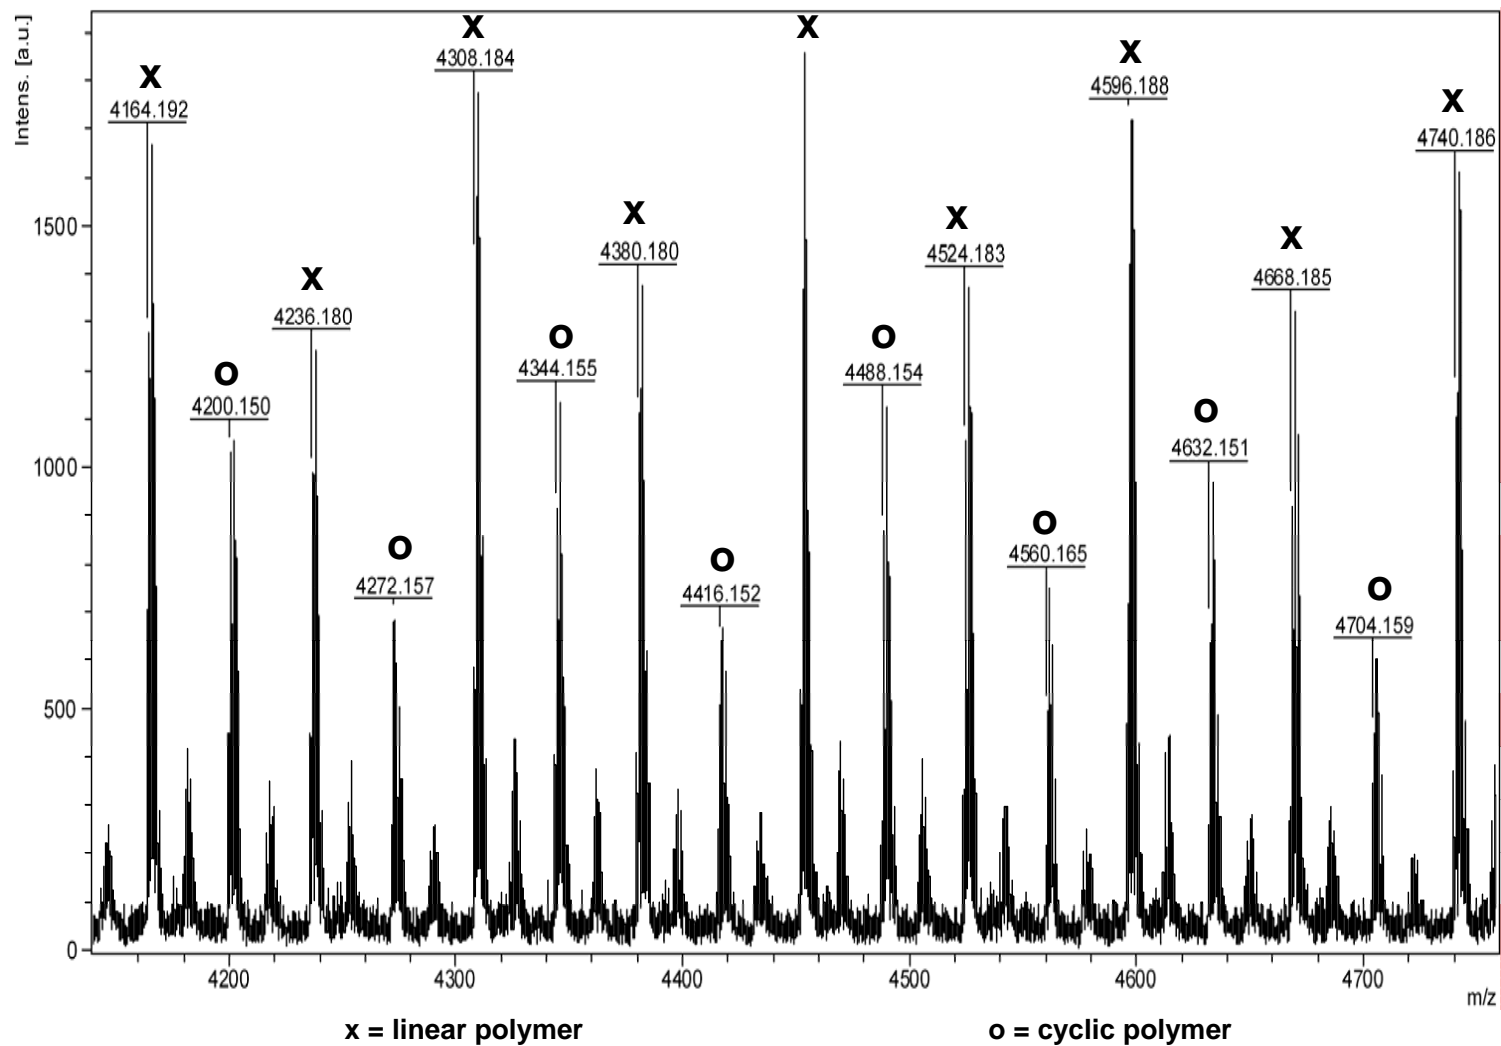

Figure S2. Blow-up of Figure S1

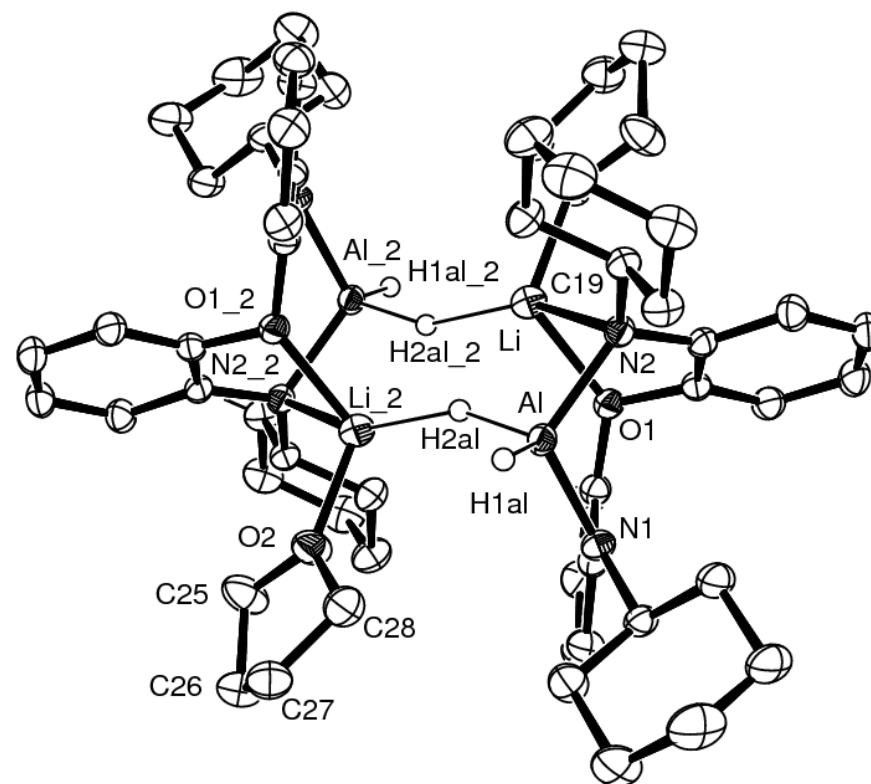

**Figure S3.** Molecular structure (ORTEP drawing) of the Al complex **2b**

**Table S1:** Summary of crystallographic data for compound **2b**

|                                                          |                                                                                   |
|----------------------------------------------------------|-----------------------------------------------------------------------------------|
| Compound                                                 | <b>2b</b> (CH <sub>2</sub> Cl <sub>2</sub> )                                      |
| Formula                                                  | C <sub>29</sub> H <sub>42</sub> AlCl <sub>2</sub> LiN <sub>2</sub> O <sub>2</sub> |
| Formula weight                                           | 555.47                                                                            |
| Crystal system                                           | triclinic                                                                         |
| Space group                                              | P-1                                                                               |
| a (Å)                                                    | 9.462(1)                                                                          |
| b (Å)                                                    | 12.194(1)                                                                         |
| c (Å)                                                    | 14.042(1)                                                                         |
| α (°)                                                    | 107.895(1)                                                                        |
| β (°)                                                    | 106.337(1)                                                                        |
| γ (°)                                                    | 91.031(1)                                                                         |
| V (Å <sup>3</sup> )                                      | 1469.82(6)                                                                        |
| Z                                                        | 2                                                                                 |
| Density (g.cm <sup>-3</sup> )                            | 1.255                                                                             |
| μ (Mo Kα) (mm <sup>-1</sup> )                            | 0.279                                                                             |
| F(000)                                                   | 592                                                                               |
| Crystal Size [mm]                                        | 0.10×0.10×0.10                                                                    |
|                                                          |                                                                                   |
| <b>Data collection</b>                                   |                                                                                   |
| Temperature (K)                                          | 173(2)                                                                            |
| Radiation (Å)                                            | MoKα - 0.71073                                                                    |
| Theta min - max                                          | 1.60 - 30.02                                                                      |
| Dataset [h, k, l]                                        | -12/13, -17/17, -19/18                                                            |
| Tot., Uniq. Data, R(int)                                 | 19301, 8573, 0.0599                                                               |
| Observed data (I>2σ(I))                                  | 6143                                                                              |
|                                                          |                                                                                   |
| <b>Refinement</b>                                        |                                                                                   |
| Nreflections, Nparameters                                | 8573, 342                                                                         |
| R2(all), R1(I>2σ(I)),<br>wR2(all), wR1(I>2σ(I)),<br>Goof | 0.0833, 0.0538, 0.1600,<br>0.1372, 0.980                                          |
| Max. and Av. Shift/Error                                 | 0.000, 0.000                                                                      |
| Min, Max. Resd Dens.<br>(e.Å <sup>-3</sup> )             | -0.686, 0.593                                                                     |
